# Supplementary material
Source: PubMed Central journal article supplement (PMC3343663)
Supplement: cr201237x2.pdf [file cr201237x2.pdf]

**Supplementary information, Table S1** Sequence of the oligonucleotides used in this article

| <b>Name</b>         | <b>Gene</b>    | <b>Sequence</b>                                       |
|---------------------|----------------|-------------------------------------------------------|
| <i>fbxl14a</i> -1S  | <i>fbxl14a</i> | 5'-CGCGAATGTTTTCTTTTCCCGAG-3'                         |
| <i>fbxl14a</i> -1AS | <i>fbxl14a</i> | 5'-CTGCGAGCTGCTCGTTAGCTTAGC-3'                        |
| <i>fbxl14b</i> -1S  | <i>fbxl14b</i> | 5'-GAGCGGAGCACAAACGCGAAACG-3'                         |
| <i>fbxl14b</i> -1AS | <i>fbxl14b</i> | 5'-GCTCAAGAAAACAAACGGCGGCAAA-3'                       |
| <i>β-actin</i> -S   | <i>β-actin</i> | 5'-CCGTGACATCAAGGAGAAGCT-3'                           |
| <i>β-actin</i> -AS  | <i>β-actin</i> | 5'-TCGTG GGATACCGCAAGATTCC-3'                         |
| <i>fbxl14a</i> -S1  | <i>fbxl14a</i> | 5'-CGGAATTCATGGAGATCCACATCTCGAGCCT-3'                 |
| <i>fbxl14a</i> -AS1 | <i>fbxl14a</i> | 5'-GCTCTAGATTAGGAGGCGTATAAAGGTAGGATC-3'               |
| <i>fbxl14a</i> -S2  | <i>fbxl14a</i> | 5'-CGGAATTCACCATGGAGATCCACATCTCGAGCCT                 |
| <i>fbxl14a</i> -AS2 | <i>fbxl14a</i> | 5'-CGCGGATCCGGAGGCGTATAAAGGTAGGATCTCA                 |
| <i>fbxl14b</i> -S   | <i>fbxl14b</i> | 5'-CGGAATTCACCATGGAGACGCACATCTCGTGT-3'                |
| <i>fbxl14b</i> -AS  | <i>fbxl14b</i> | 5'-AGCCTCGAGTCACCTCACTTTCTCACTTTCAGTC-3'              |
| <i>fbxl14</i> -S    | <i>fbxl14</i>  | 5'-GGAATTCATGGAGACCCACATCTCGTGCCT-3'                  |
| <i>fbxl14</i> -AS   | <i>fbxl14</i>  | 5'-AGCCTCGAGTCACCTGACCTTCTCACTGTCCGTC-3'              |
| <i>AF+BL</i> -S1    | <i>AF+BL</i>   | 5'-CGGAATTCATGGAGATCCACATCTCGAGCCT                    |
| <i>AF+BL</i> -AS1   | <i>AF+BL</i>   | 5'-TCTCAGATGCAGCTTTGCTTCTACTCCTCTCCATACGGATT<br>TGTGA |
| <i>AF+BL</i> -S2    | <i>AF+BL</i>   | 5'-CAAATCCGTATGGAGAGGAGTAGAAGCAAAGCTGCATCTG<br>AGAC   |
| <i>AF+BL</i> -AS2   | <i>AF+BL</i>   | 5'-GCTCTAGATCACCTCACTTTCTCACTTTCAGTC                  |
| <i>BF+AL</i> -S1    | <i>BF+AL</i>   | 5'-CGGAATTCACCATGGAGACGCACATCTCGTGT                   |
| <i>BF+AL</i> -AS1   | <i>BF+AL</i>   | 5'-TCTCAGATGGAGTTTGGCTTCCACCCCTCCACACGGAC<br>TT       |
| <i>BF+AL</i> -S2    | <i>BF+AL</i>   | 5'-AGTCCGTGTGGAGGGGGTGAAGCCAAACTCCATCTGA<br>GAAG      |
| <i>BF+AL</i> -AS1   | <i>BF+AL</i>   | 5'-AGCCTCGAGTTAGGAGGCGTATAAAGGTAGGATC                 |
| <i>A</i> -MO        | <i>fbxl14a</i> | 5'-TTTCTAGTCGGAGTAGACGCTGTTT-3'                       |
| <i>B</i> -MO        | <i>fbxl14b</i> | 5'-AGAAAACAAACGGCGGCAAAACCC-3'                        |
| cMO                 |                | 5'-TCAAGCTGCATAGCTGCTGCGCTGCTGC-3'                    |
