# Supplementary material
Source: PubMed Central journal article supplement (PMC3343663)
Supplement: cr201237x3.pdf [file cr201237x3.pdf]

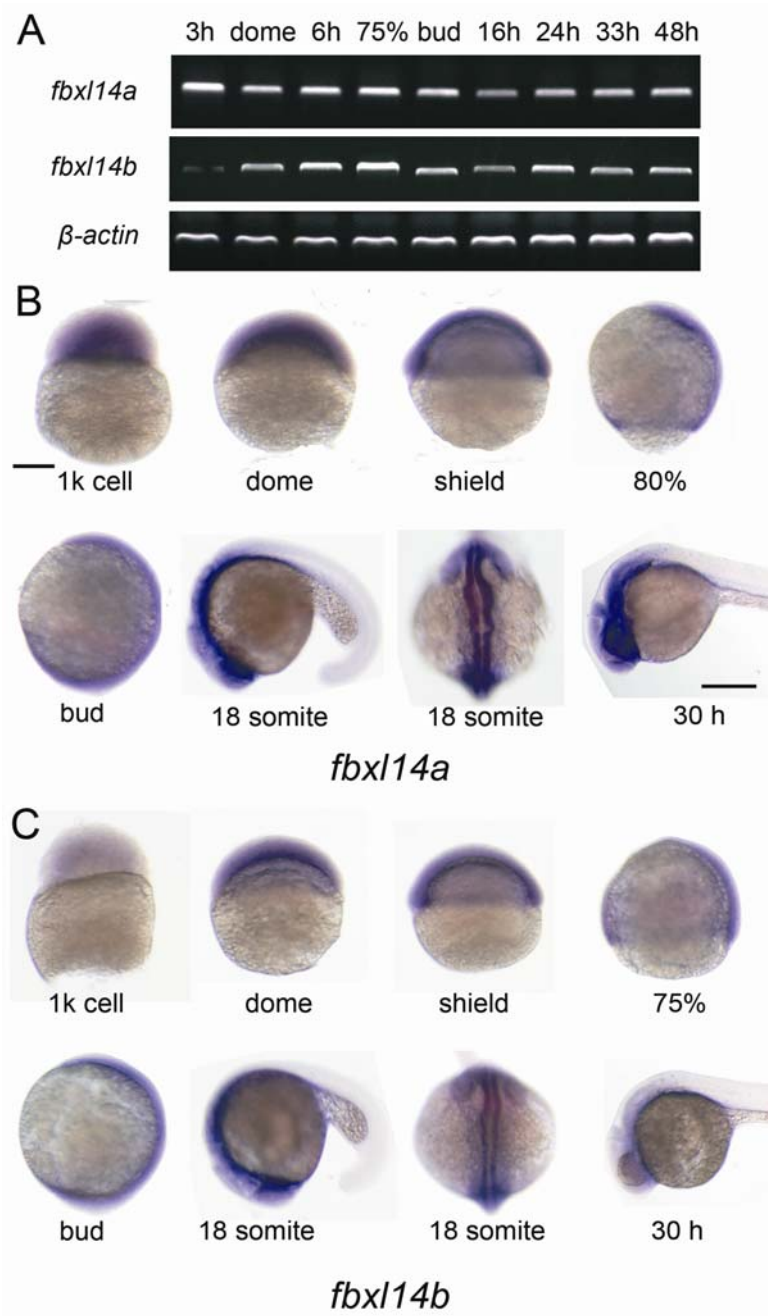

**Supplementary information, Figure S1** Temporal and spatial expression pattern of *fbxl14a* and *fbxl14b*. **(A)** RT-PCR analysis of *fbxl14a* and *fbxl14b* RNA levels at different stages of zebrafish development. Expression of  $\beta$ -actin is shown as a control for loading. **(B and C)** Expression pattern of *fbxl14a* **(B)** and *fbxl14b* **(C)** detected by whole-mount in situ hybridization, at indicated stages. Scale bar 200  $\mu$ m
