# Supplementary material
Source: PubMed Central journal article supplement (PMC3343663)
Supplement: cr201237x4.pdf [file cr201237x4.pdf]

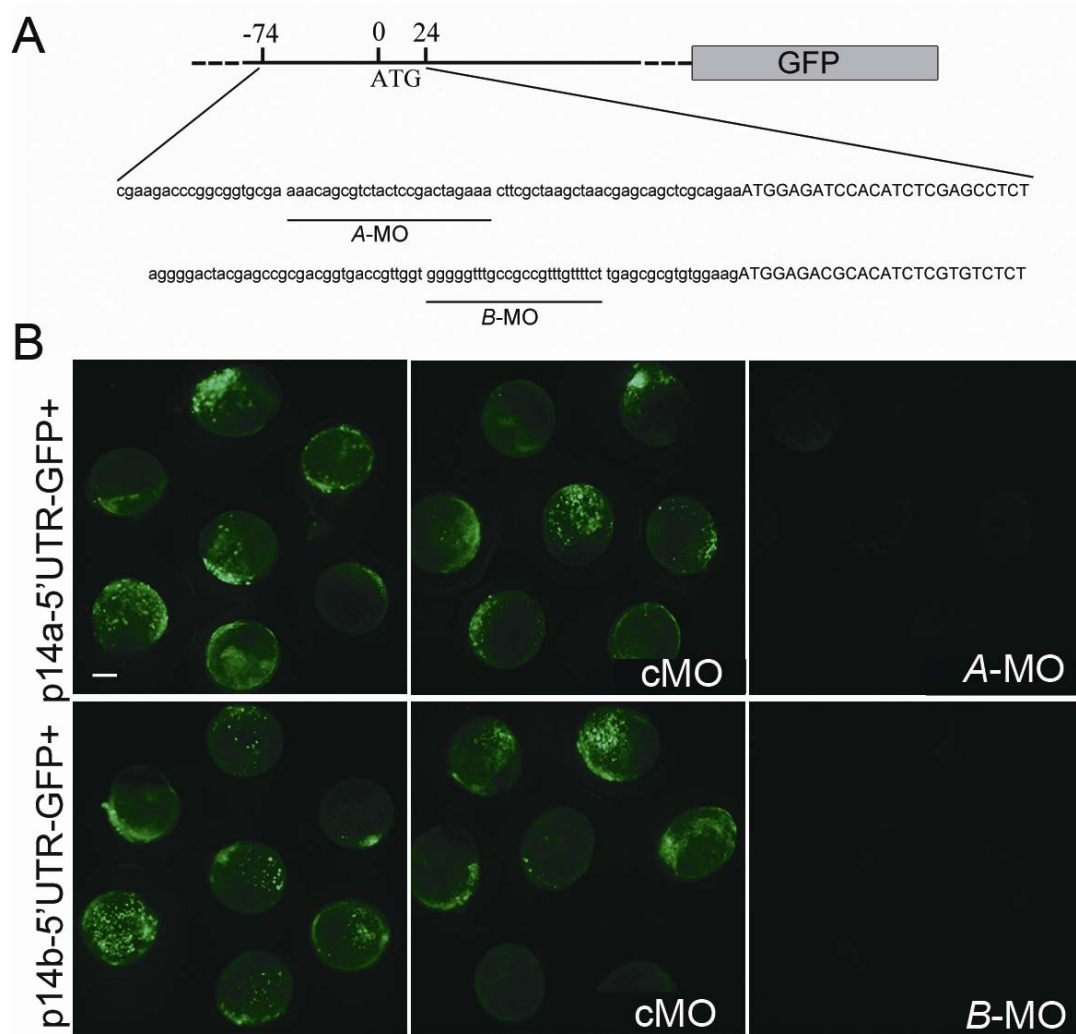

**Supplementary information, Figure S2** Morpholino design and efficiency examination. **(A)** Scheme presentation of *fbx114a(b)*-5'UTR-GFP reporter plasmid constructs and morpholino sites. **(B)** The effectiveness of the used MOs was tested using the corresponding 5'-UTR-GFP expression constructs. 100 ng of the 5'-UTR-GFP plasmid DNA was injected alone or with 0.8 pmol of a MO at the one-cell stage, and a group of embryos were photographed during late gastrulation. Scale bar 200  $\mu$ m
