# Supplementary material
Source: PubMed Central journal article supplement (PMC3343663)
Supplement: cr201237x5.pdf [file cr201237x5.pdf]

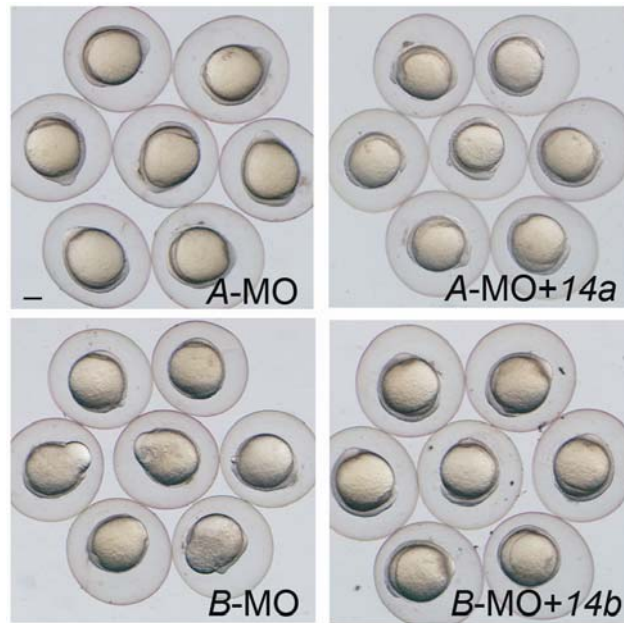

**Supplementary information, Figure S3** The phenotypes caused by *A-MO* and *B-MO* injection could be neutralized by *fbxl14a* and *fbxl14b* mRNA coinjection, respectively. Injection doses: 200 pg for *fbxl14a* or *fbxl14b* mRNA, 2.0 pmol for *A-MO*, 1.0 pmol for *B-MO*.
