# Supplementary material
Source: PubMed Central journal article supplement (PMC3343663)
Supplement: cr201237x6.pdf [file cr201237x6.pdf]

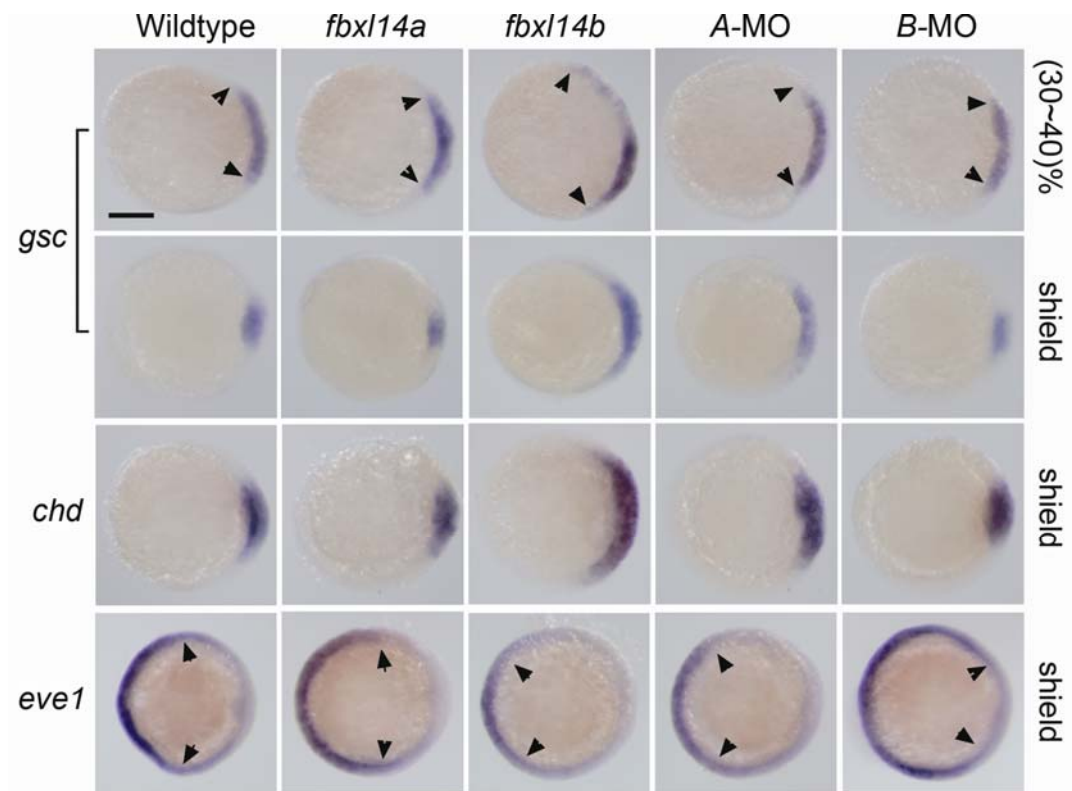

**Supplementary information, Figure S4** Expression of marker genes in wildtype and mRNA- or MO-injected embryos. Developmental stages are indicated at the right. Embryos are animal views and dorsal to the right. Injection doses: 300 pg for *fbxl14a* or *fbxl14b* mRNA, 2.0 pmol for A-MO, 1.0 pmol for B-MO. Scale bar 200  $\mu$ m
