# Supplementary material
Source: PubMed Central journal article supplement (PMC3343663)
Supplement: cr201237x7.pdf [file cr201237x7.pdf]

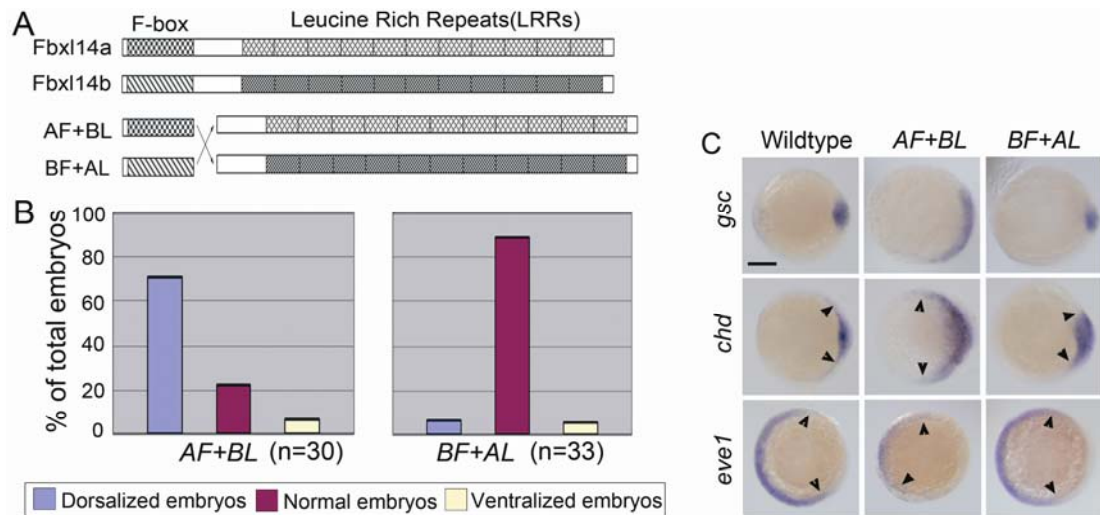

**Supplementary information, Figure S5** Analysis of functional domain in Fbxl14a and Fbxl14b. **(A)** Schematic representation of Fbxl14a and Fbxl14b protein, and different mutational constructs. Functional domains were identified using the SMART program (<http://smart.embl-heidelberg.de>). **(B)** Statistical data of phenotypes caused by the indicated injections. Embryos were injected with 300 pg of each indicated mRNA species at the one-cell stage. **(C)** The expression of the indicated marker genes in the embryos of various injections at shield stage. All are animal pole views with dorsal oriented toward the right.

Scale bar 200  $\mu$ m
