# Supplementary material
Source: PubMed Central journal article supplement (PMC3343663)
Supplement: cr201237x8.pdf [file cr201237x8.pdf]

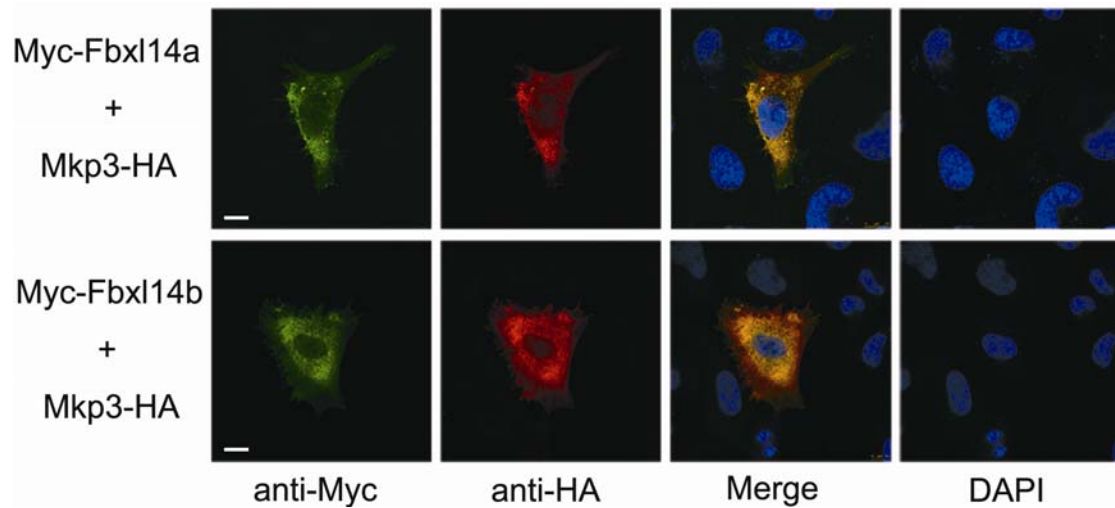

**Supplementary information, Figure S6** The subcellular localization of Fbxl14a, Fbxl14b and Mkp3 in mammalian cells, as determined by immunofluorescence. HeLa cells were transiently transfected with the indicated expression constructs, fixed and stained for the distribution of Fbxl14a, Fbxl14b and Mkp3. DAPI was used to identify nuclei. Scale bar 10  $\mu\text{m}$
